# Supplementary material for: Switching-on superparamagnetism in diluted magnetic Fe(iii) doped CdSe quantum dots
Source: Royal Society of Chemistry journal article supplement (doi:10.1039/c9ce01391a), 2020-01-01
Supplement: c9ce01391a1.pdf [file c9ce01391a1.pdf]

## Electronic Supplementary Information (ESI)

### Switching-on Superparamagnetism in diluted magnetic Fe (III) doped CdSe Quantum Dots

Amar Nath Yadav<sup>1</sup>, Jasleen K. Bindra<sup>2</sup>, Narendra Jakhar<sup>3</sup>, Kedar Singh\*<sup>1</sup>

<sup>1</sup>School of Physical Sciences, Jawaharlal Nehru University, New Delhi-110067, India

<sup>2</sup>Department of Chemistry and Biochemistry, Florida State University, Tallahassee, Florida-32306, United States

<sup>2</sup>National High Magnetic Field Laboratory, Florida State University, Tallahassee, Florida -32310, United States

<sup>3</sup>Department of Physics, University of Rajasthan, Jaipur-302004, India

#### S.1 EDX analysis of Fe doped CdSe QDs

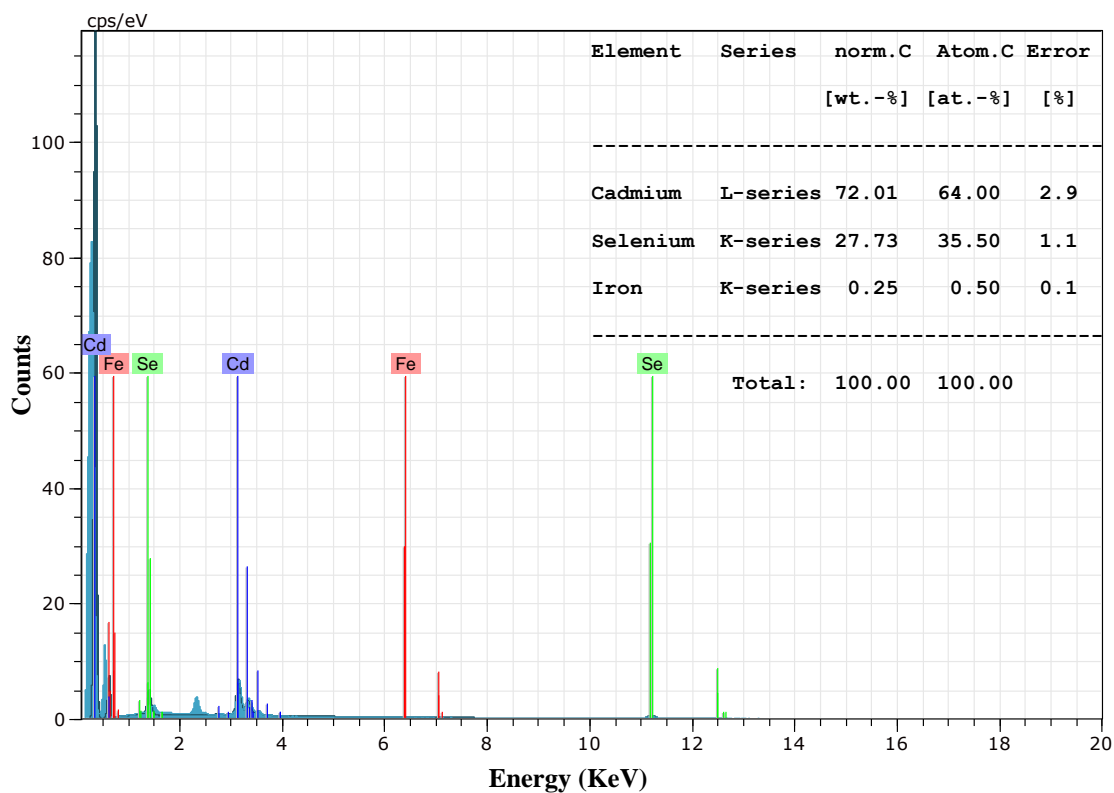

**Figure S.1** EDX spectrum of Fe doped CdSe QDs. Inset shows elemental mapping of Fe doped CdSe QDs

## S.2 TRPL Fitting

The PL decay curves of CdSe and Fe doped CdSe QDs can be well fitted with a bi-exponential function, using the following equation

$$Y(\tau) = a_1 e^{\frac{-\tau}{\tau_1}} + a_2 e^{\frac{-\tau}{\tau_2}}$$

The average lifetime calculated by

$$\tau_{ave} = \frac{a_1 \tau_1^2 + a_2 \tau_2^2}{a_1 \tau_1 + a_2 \tau_2}$$

Where  $\tau_1$  and  $\tau_2$  are the first and second component of decay time,  $a_1$  and  $a_2$  are corresponding amplitudes (1).

## S.3 Field-dependent magnetization Curve

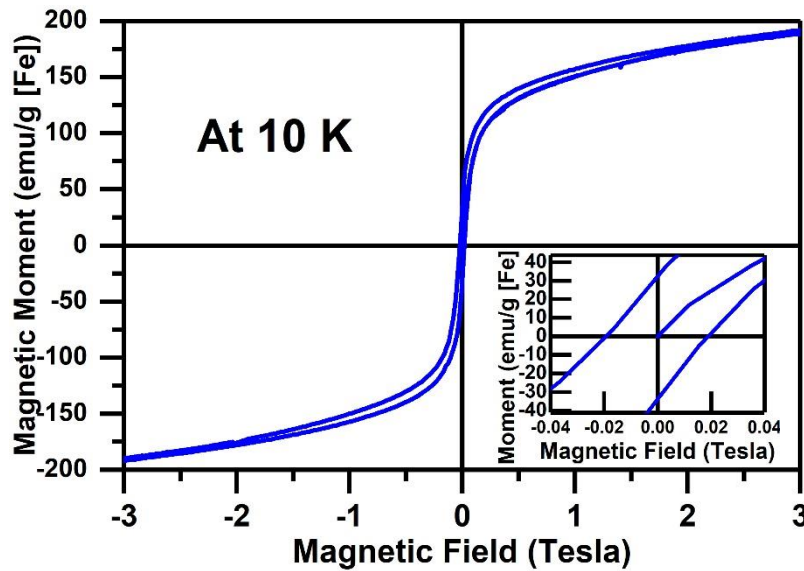

**Figure S.2** MH curve for  $\text{Cd}_{0.955}\text{Fe}_{0.005}\text{Se}$  QDs at 10 K. Inset image shows hysteresis loop.

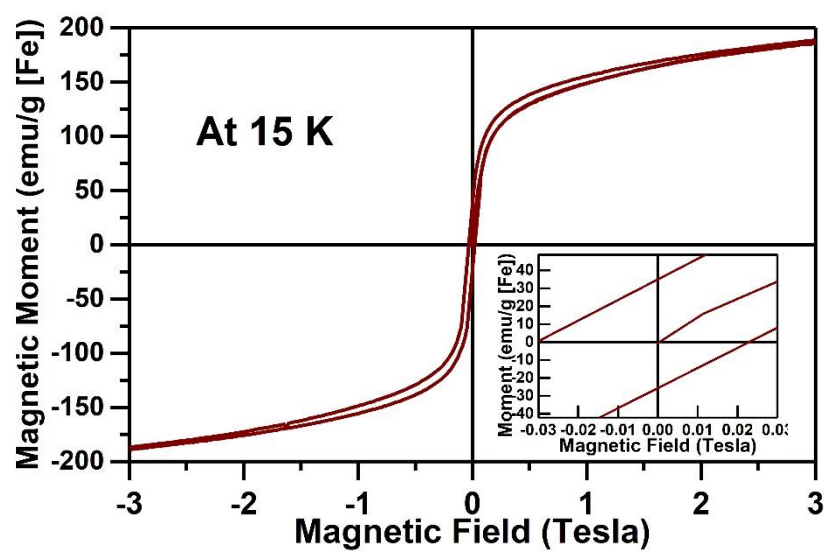

**Figure S.3** MH curve of  $\text{Cd}_{0.955}\text{Fe}_{0.005}\text{Se}$  QDs at 15 K. Inset image shows hysteresis loop.

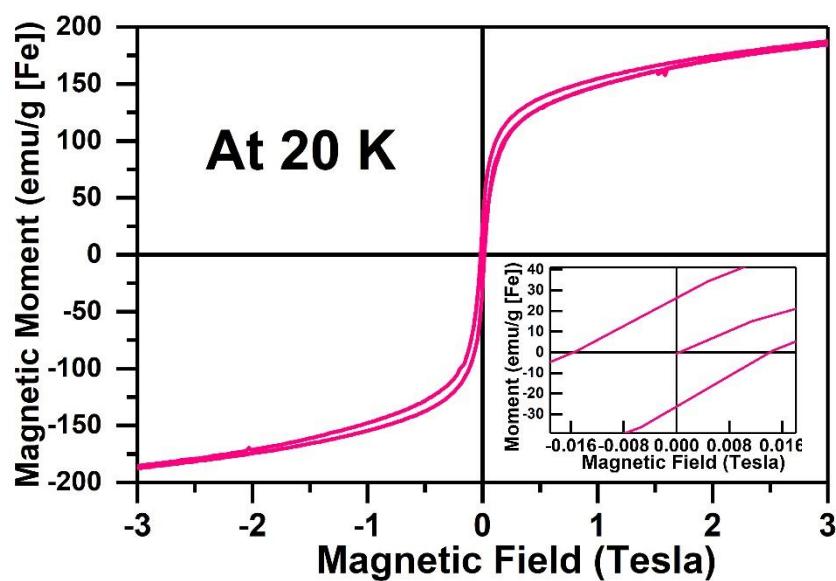

**Figure S.4** MH curve of  $\text{Cd}_{0.955}\text{Fe}_{0.005}\text{Se}$  QDs at 20 K. Inset image shows hysteresis loop.

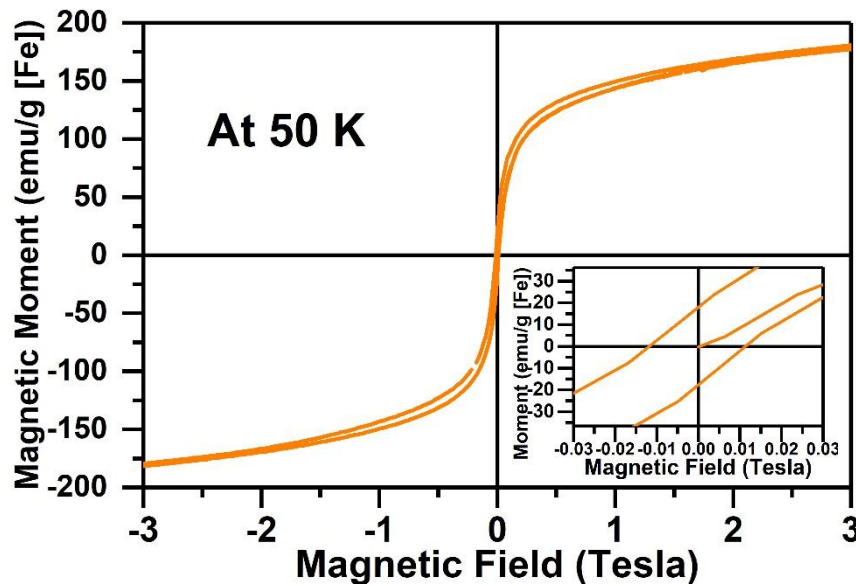

**Figure S.5** MH curve of Cd<sub>0.955</sub>Fe<sub>0.005</sub>Se QDs at 50 K. Inset image shows hysteresis loop.

### Calculation of the number of atoms per QD lattice

The calculation is as follows:

The volume of the sphere:  $\frac{4}{3} \pi r^3$

For 3 nm of Fe: CdSe QD,  $r = 1.5$  nm

Thus, the volume of the QD,  $V_{\text{QD}} = 14.13 \text{ nm}^3$

The volume of CdSe (wurtzite) unit cell,  $V_{\text{unit cell}} = 0.112 \text{ nm}^3$

The number of the unit cells in 3 nm of Fe: CdSe QD

$$N = \frac{V_{\text{QD}}}{V_{\text{unit cell}}} \sim 126$$

Since 1 unit cell of CdSe (wurtzite) has 4 atoms, hence we have  $126 \times 4 = 504$  number of total (Cd and Se) atoms.

Which means for 0.5% Fe doped CdSe QD, we have an average of  $\sim 2$  Fe atoms

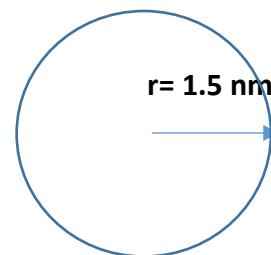

### References

1. A. N. Yadav, A.K. Singh, S. Srivastava, M. Kumar, B.K. Gupta, K. Singh, Phys. Chem. Chem. Phys., 2019, 21, 6265
